# Supplementary material for: Effects of HLA-DRB1 alleles on susceptibility and clinical manifestations in Japanese patients with adult onset Still’s disease
Source: Springer Nature journal article supplement (doi:10.1186/s13075-017-1406-x), 2017-09-12
Supplement: MOESM2 [file 15047296]

Table S1. *HLA-DRB1* allele carrier frequency in the AOSD patients and age-matched healthy controls (1:2)

|                      | Case (n=69) | Control (n=138) | <i>P</i> | OR   | <i>P<sub>c</sub></i> | 95%CI        |
|----------------------|-------------|-----------------|----------|------|----------------------|--------------|
| <i>DRB1*01:01</i>    | 6 (8.7)     | 19 (13.8)       | 0.3686   | 0.60 | NS                   | (0.23-1.57)  |
| <i>DRB1*04:01</i>    | 0 (0.0)     | 4 (2.9)         | 0.3036   | 0.22 | NS                   | (0.01-4.05)  |
| <i>DRB1*04:03</i>    | 4 (5.8)     | 4 (2.9)         | 0.4450   | 2.06 | NS                   | (0.50-8.51)  |
| <i>DRB1*04:05</i>    | 12 (17.4)   | 38 (27.5)       | 0.1231   | 0.55 | NS                   | (0.27-1.15)  |
| <i>DRB1*04:06</i>    | 2 (2.9)     | 12 (8.7)        | 0.1486   | 0.31 | NS                   | (0.07-1.44)  |
| <i>DRB1*04:07</i>    | 0 (0.0)     | 2 (1.4)         | 0.5534   | 0.39 | NS                   | (0.02-8.30)  |
| <i>DRB1*04:10</i>    | 2 (2.9)     | 6 (4.3)         | 0.7215   | 0.66 | NS                   | (0.13-3.34)  |
| <i>DRB1*07:01</i>    | 0 (0.0)     | 3 (2.2)         | 0.5523   | 0.28 | NS                   | (0.01-5.47)  |
| <i>DRB1*08:02</i>    | 8 (11.6)    | 8 (5.8)         | 0.1697   | 2.13 | NS                   | (0.76-5.95)  |
| <i>DRB1*08:03</i>    | 13 (18.8)   | 20 (14.5)       | 0.4268   | 1.37 | NS                   | (0.64-2.95)  |
| <i>DRB1*09:01</i>    | 7 (10.1)    | 31 (22.5)       | 0.0360   | 0.39 | 0.8291               | (0.16-0.94)  |
| <i>DRB1*11:01</i>    | 4 (5.8)     | 5 (3.6)         | 0.4850   | 1.64 | NS                   | (0.43-6.30)  |
| <i>DRB1*12:01</i>    | 13 (18.8)   | 8 (5.8)         | 0.0060   | 3.77 | 0.1388               | (1.48-9.61)  |
| <i>DRB1*12:02</i>    | 6 (8.7)     | 4 (2.9)         | 0.0870   | 3.19 | NS                   | (0.87-11.71) |
| <i>DRB1*13:02</i>    | 5 (7.2)     | 19 (13.8)       | 0.2488   | 0.49 | NS                   | (0.17-1.37)  |
| <i>DRB1*14:03</i>    | 5 (7.2)     | 5 (3.6)         | 0.3063   | 2.08 | NS                   | (0.58-7.44)  |
| <i>DRB1*14:05</i>    | 4 (5.8)     | 6 (4.3)         | 0.7340   | 1.35 | NS                   | (0.37-4.97)  |
| <i>DRB1*14:06</i>    | 1 (1.4)     | 5 (3.6)         | 0.6659   | 0.39 | NS                   | (0.04-3.42)  |
| <i>DRB1*14:07</i>    | 0 (0.0)     | 1 (0.7)         | 1.0000   | 0.66 | NS                   | (0.03-16.40) |
| <i>DRB1*14:54</i>    | 5 (7.2)     | 11 (8.0)        | 1.0000   | 0.90 | NS                   | (0.30-2.71)  |
| <i>DRB1*15:01</i>    | 26 (37.7)   | 18 (13.0)       | 0.0001   | 4.03 | 0.0025               | (2.01-8.07)  |
| <i>DRB1*15:02</i>    | 11 (15.9)   | 37 (26.8)       | 0.1151   | 0.52 | NS                   | (0.25-1.09)  |
| <i>DRB1*16:02</i>    | 0 (0.0)     | 1 (0.7)         | 1.0000   | 0.66 | NS                   | (0.03-16.40) |
| <i>DR5(*11, *12)</i> | 21 (30.4)   | 17 (12.3)       | 0.0022   | 3.11 |                      | (1.51-6.41)  |

Allele carrier frequencies are shown in parenthesis (%). Association was tested by Fisher's exact test using 2x2 contingency tables under the dominant model. AOSD: adult onset still disease, OR: odds ratio, CI: confidence interval, *P<sub>c</sub>*: corrected P value, NS: not significant. Mean age  $\pm$  SD of AOSD patients and healthy controls were  $46.8 \pm 15.9$  and  $46.2 \pm 15.4$  years, respectively.
