# Supplementary material for: Effects of HLA-DRB1 alleles on susceptibility and clinical manifestations in Japanese patients with adult onset Still’s disease
Source: Springer Nature journal article supplement (doi:10.1186/s13075-017-1406-x), 2017-09-12
Supplement: MOESM3 [file 15047296]

Table S2. Conditional logistic regression analysis between the protective HLA alleles in AOSD

| HLA allele        | Unconditioned         |                     | Conditioned on gender        |                                | Conditioned on age           |                                | Conditioned on <i>DRB1*09:01</i> |                                | Conditioned on <i>DRB1*15:01</i> |                                | Conditioned on DR5           |                                |
|-------------------|-----------------------|---------------------|------------------------------|--------------------------------|------------------------------|--------------------------------|----------------------------------|--------------------------------|----------------------------------|--------------------------------|------------------------------|--------------------------------|
|                   | <i>P</i>              | OR (95%CI)          | <i>P</i> <sub>adjusted</sub> | OR <sub>adjusted</sub> (95%CI) | <i>P</i> <sub>adjusted</sub> | OR <sub>adjusted</sub> (95%CI) | <i>P</i> <sub>adjusted</sub>     | OR <sub>adjusted</sub> (95%CI) | <i>P</i> <sub>adjusted</sub>     | OR <sub>adjusted</sub> (95%CI) | <i>P</i> <sub>adjusted</sub> | OR <sub>adjusted</sub> (95%CI) |
| <i>DRB1*09:01</i> | 0.0010                | 0.35<br>(0.19–0.65) | 0.0013                       | 0.36<br>(0.20–0.67)            | 0.0020                       | 0.32<br>(0.16–0.66)            | NA                               | NA                             | 0.0031                           | 0.39<br>(0.21–0.73)            | 0.0030                       | 0.39<br>(0.21–0.73)            |
| <i>DRB1*15:01</i> | 0.0001                | 2.35<br>(1.55–3.55) | 0.0001                       | 2.36<br>(1.56–3.58)            | 2.17X10 <sup>-5</sup>        | 2.88<br>(1.77–4.68)            | 0.0004                           | 2.11<br>(1.39–3.20)            | NA                               | NA                             | 1.35X10 <sup>-5</sup>        | 2.55<br>(1.67–3.88)            |
| DR5               | 2.28X10 <sup>-5</sup> | 2.39<br>(1.60–3.58) | 2.31X10 <sup>-5</sup>        | 2.41<br>(1.60–3.61)            | 2.20X10 <sup>-5</sup>        | 2.93<br>(1.78–4.82)            | 0.0002                           | 2.17<br>(1.44–3.26)            | 6.07X10 <sup>-6</sup>            | 2.58<br>(1.71–3.90)            | NA                           | NA                             |

AOSD: adult onset still's disease, OR: odds ratio, CI: confidence interval, NA not applicable. *P*, OR, 95%CI, *P*<sub>adjusted</sub>, OR<sub>adjusted</sub> were calculated by logistic regression analysis under the additive model.
